# Supplementary material for: A novel approach to the extraction and analysis of dioxins and furans sampled onto Amberlite XAD-2 sorbent
Source: Royal Society of Chemistry journal article supplement (doi:10.1039/d4ay01609b), 2024-01-01
Supplement: d4ay01609b1.log [file d4ay01609b1.log]

%%[ ProductName: Distiller ]%%
Aptos not found, using Courier.
%%[ Flushing: rest of job (to end-of-file) will be ignored ]%%
%%[ Warning: PostScript error. No PDF file produced. ] %%
